# Supplementary material for: Combination of Metaheuristic and Exact Algorithms for Solving Set Covering-Type Optimization Problems
Source: Atypon-hosted journal article supplement (doi:10.1287/ijoc.1090.0376), 2010-03-24
Supplement: ijoc.1090.0376-sm-muter_birbil_sahin.pdf [file ijoc.1090.0376-sm-muter_birbil_sahin.pdf]

# Online Supplement For “Combination of Meta-Heuristic and Exact Algorithms for Solving Set Covering-Type Optimization Problems”

İbrahim Muter, Ş. İlker Birbil and Güvenç Şahin

Faculty of Engineering and Natural Sciences, Sabancı University, 34956 Istanbul, Turkey,  
{imuter@su.sabanciuniv.edu, sibirbil@sabanciuniv.edu, guvencs@sabanciuniv.edu}

## 1. Implementation Details and Additional Results

The details of the modified version of the tabu search algorithm proposed by Potvin et al. (1996) is explained in this Online Supplement. Let  $d_{ij}$  denote the distance between customers  $i$  and  $j$ , and  $s_{jk}^2$  ( $s_{jk}^{Or}$ ) denote the saving in the travel distance for a 2-Opt (Or-Opt) move oriented at customers  $j$  and  $k$ . In both procedures,  $q$  customers are selected randomly to restrict the possible exchanges. For each of the  $q$  customers, only  $h$  nearest neighbors are considered for possible exchanges. Suppose we select customer  $k$  and  $j \in N^h(k)$  (i.e.  $j$  is one of the  $h$  neighbors of customer  $k$ ). For a 2-Opt move, the customers  $j$  and  $k$  should not be in the same route. Let  $s_{jk}^2$  be the saving in traveled distance when the routes, on which  $k$  and  $j$  reside, are changed as follows:

- The route, on which  $j$  resides, visits customer  $k$  after customer  $j$ , and continues with the subsequent customers on the route, on which  $k$  resides, in the same order.
- The route, on which  $k$  resides, visits customer  $j + 1$  after customer  $k - 1$ , and continues with the subsequent customers of the route, on which  $j$  resides, in the same order.

For an Or-Opt move,  $k$  and  $j$  can be in either the same route or different routes. Let  $s_{jk}^{Or}$  be the saving in traveled distance when the routes, on which  $k$  and  $j$  reside, are changed according to the first feasible move listed as follows:

- Insert customers  $j$ ,  $j + 1$  and  $j + 2$  between customers  $k$  and  $k + 1$ , and let the route, on which  $j$  resides, visit customer  $j + 3$  after  $j - 1$ .
- Insert customers  $j$  and  $j + 1$  between customers  $k$  and  $k + 1$ , and let the route, on which  $j$  resides, visit customer  $j + 2$  after  $j - 1$ .

- Insert customer  $j$  between customers  $k$  and  $k + 1$ , and let the route, on which  $j$  resides, visit customer  $j + 1$  after  $j - 1$ .

For both 2-Opt and Or-Opt exchanges, the inverse move of a feasible selected exchange is declared tabu for a number of iterations determined by the size of the tabu list.

---

**Algorithm 4:** Meta-heuristic Component for VRPTW

---

```

1:  $i = 1$ 
2: while  $i \leq I_{tot}$  do
3:   for  $i_{2opt}=1$  to  $I_{2opt}$  do
4:     Select  $q$  customers randomly
5:     foreach customer  $k = 1$  to  $q$  do
6:       | 2-Opt( $k$ )
7:     end
8:      $k^* = \arg \min_{k \in \{1, \dots, q\}} \{s^2(j^*(k))\}$ 
9:     Delete  $(k^*, k^* + 1)$  and  $(j^*(k), j^*(k) + 1)$ 
10:    Add  $(k^*, j^* + 1)$  and  $(j^*(k), k^* + 1)$ 
11:    The inverse move is declared tabu
12:     $i \leftarrow i + 1$ 
13:  end
14:  for  $i_{Oropt}=1$  to  $I_{Oropt}$  do
15:    Select  $q$  customers randomly
16:    foreach customer  $k = 1$  to  $q$  do
17:      | Or-Opt( $k$ )
18:    end
19:     $k^* = \arg \min_{k \in \{1, \dots, q\}} \{s^{Or}(j^*(k))\}$ 
20:    Delete  $(k^*, k^* + 1)$ ,  $(j^*(k) - 1, j^*(k))$  and
     $(j^*(k) + u(k^*, j^*(k)), j^*(k) + u(k^*, j^*(k)) + 1)$ 
21:    Add  $(k^*, j^*(k))$ ,  $(j^*(k) + u(k^*, j^*(k)), k^* + 1)$  and
     $(j^*(k) - 1, j^*(k) + u(k^*, j^*(k)) + 1)$ 
22:    The inverse move is declared tabu
23:     $i \leftarrow i + 1$ 
24:  end
25: end

```

---

---

**Algorithm 5: 2-Opt( $k$ )**

---

```
1: 2-Opt( $k$ )
2: foreach  $j \in N^h(k)$  do
3:   if ( $j$  and  $k$  are in different routes) and (2-Opt move oriented at  $j$  and  $k$  is
   feasible) then
4:      $s^2(j) = (d_{j,j+1} + d_{k,k+1}) - (d_{j,k+1} + d_{k,j+1})$ 
5:   else
6:      $s^2(j) = -\infty$ 
7:   end
8: end
9:  $j^*(k) = \arg \min_{j \in N^h(k)} \{s^2(j)\}$ 
```

---

---

**Algorithm 6: Or-Opt( $k$ )**

---

```
1: foreach  $j \in N^h(k)$  do
2:   if (it is feasible to insert segment  $\{j, j+1, j+2\}$  between  $k$  and  $k+1$ ) then
3:      $s^{Or}(j) = (d_{j,j-1} + d_{k,k+1} + d_{j+2,j+3}) - (d_{k,j} + d_{j+2,k+1} + d_{j-1,j+3})$ 
4:      $u(k, j) = 2$ 
5:   else if (it is feasible to insert segment  $\{j, j+1\}$  between  $k$  and  $k+1$ ) then
6:      $s^{Or}(j) = (d_{j,j-1} + d_{k,k+1} + d_{j+1,j+2}) - (d_{k,j} + d_{j+1,k+1} + d_{j-1,j+2})$ 
7:      $u(k, j) = 1$ 
8:   else if (it is feasible to insert  $j$  between  $k$  and  $k+1$ ) then
9:      $s^{Or}(j) = (d_{j,j-1} + d_{k,k+1} + d_{j,j+1}) - (d_{k,j} + d_{j,k+1} + d_{j-1,j+1})$ 
10:     $u(k, j) = 0$ 
11:   else
12:      $s^{Or}(j) = -\infty$ 
13:   end
14: end
15:  $j^*(k) = \arg \min_{j \in N^h(k)} \{s^{Or}(j)\}$ 
```

---

---

**Algorithm 7:** Column Pool Management for VRPTW

---

```
1: Let  $y$  be a newly generated column
2: foreach column  $x$  in column pool do
3:   if  $x = y$  then
4:     | Delete  $y$ 
5:   else if (customers in  $x$  = customers in  $y$ ) and ( $distance(x) \prec distance(y)$ ) then
6:     | Delete  $y$ 
7:   else if (customers in  $x$  = customers in  $y$ ) and ( $distance(x) \succ distance(y)$ ) then
8:     | Delete  $x$ 
9:   else
10:    | Add  $y$  to the column pool
11:  end
12: end
```

---

---

**Algorithm 8:** Exact Algorithm for VRPTW

---

```
1: if  $((Z_{UB}(k) - Z_{PLB}(k))/Z_{PLB}(k)) > \alpha$  then
2:   |  $Z_{PLB}(k) \leftarrow$  Solve IP
3: else
4:   |  $Z_{PLB}(k) \leftarrow$  Solve LPR
5: end
```

---

Table 6: Using dual information for the Solomon test set - instances R1, RC1 and C1

| Instances | MetaOptD |    | MetaOptD-A |       | MetaOptR |    | MetaOptR-A |       | MetaOptD+R |    | MetaOptD+R-A |       | MetaOpt  |    | MetaOpt-A |       |
|-----------|----------|----|------------|-------|----------|----|------------|-------|------------|----|--------------|-------|----------|----|-----------|-------|
|           | TD       | NV | TD         | NV    | TD       | NV | TD         | NV    | TD         | NV | TD           | NV    | TD       | NV | TD        | NV    |
| R101      | 1642.880 | 20 | 1642.880   | 20    | 1642.880 | 20 | 1642.880   | 20    | 1643.370   | 20 | 1644.230     | 20    | 1642.880 | 20 | 1642.880  | 20    |
| R102      | 1474.110 | 18 | 1476.820   | 18    | 1472.810 | 18 | 1472.810   | 18    | 1474.430   | 18 | 1475.530     | 18    | 1472.810 | 18 | 1472.810  | 18    |
| R103      | 1220.070 | 14 | 1221.200   | 14    | 1216.080 | 14 | 1217.020   | 14    | 1220.110   | 14 | 1220.470     | 14    | 1215.000 | 14 | 1216.740  | 14    |
| R104      | 989.181  | 11 | 1005.590   | 11.33 | 985.918  | 11 | 996.300    | 11    | 981.919    | 11 | 999.120      | 11    | 976.764  | 11 | 980.540   | 11    |
| R105      | 1360.780 | 15 | 1363.940   | 15    | 1360.780 | 15 | 1360.780   | 15    | 1360.780   | 15 | 1362.110     | 15    | 1360.780 | 15 | 1360.780  | 15    |
| R106      | 1252.630 | 13 | 1255.690   | 13    | 1243.080 | 13 | 1246.930   | 13    | 1249.990   | 13 | 1252.410     | 13    | 1240.880 | 13 | 1243.210  | 13    |
| R107      | 1082.130 | 12 | 1084.790   | 12    | 1075.200 | 11 | 1077.530   | 11    | 1079.190   | 12 | 1081.270     | 12    | 1074.310 | 11 | 1074.640  | 11    |
| R108      | 958.874  | 10 | 965.370    | 10.67 | 956.047  | 10 | 963.960    | 10    | 957.987    | 10 | 964.050      | 10    | 948.388  | 10 | 961.280   | 10    |
| R109      | 1154.350 | 13 | 1156.440   | 13    | 1152.820 | 13 | 1153.450   | 13    | 1158.330   | 13 | 1158.710     | 13    | 1151.840 | 13 | 1153.300  | 13    |
| R110      | 1086.370 | 12 | 1093.230   | 12    | 1073.460 | 12 | 1077.560   | 12    | 1077.410   | 12 | 1089.190     | 12    | 1072.410 | 12 | 1078.320  | 12    |
| R111      | 1068.690 | 12 | 1074.760   | 12    | 1057.490 | 12 | 1066.630   | 11.67 | 1057.550   | 12 | 1060.150     | 12    | 1054.950 | 12 | 1067.720  | 12    |
| R112      | 967.960  | 10 | 970.790    | 10.33 | 964.732  | 10 | 972.530    | 10.66 | 978.427    | 11 | 984.420      | 11    | 962.303  | 10 | 973.170   | 10.33 |
| RC101     | 1630.840 | 15 | 1645.220   | 15    | 1629.970 | 15 | 1632.840   | 15    | 1624.060   | 15 | 1643.790     | 15    | 1624.930 | 15 | 1632.660  | 15    |
| RC102     | 1491.440 | 15 | 1492.640   | 15    | 1467.260 | 14 | 1478.280   | 14.33 | 1462.300   | 14 | 1483.570     | 14.33 | 1468.370 | 14 | 1485.600  | 14.67 |
| RC103     | 1271.750 | 11 | 1287.020   | 11.67 | 1280.400 | 11 | 1290.640   | 11.33 | 1285.660   | 11 | 1288.120     | 11.67 | 1267.090 | 11 | 1267.240  | 11    |
| RC104     | 1155.510 | 10 | 1158.260   | 10.33 | 1145.660 | 10 | 1151.790   | 10.67 | 1146.970   | 10 | 1152.920     | 10.33 | 1151.420 | 11 | 1159.160  | 11    |
| RC105     | 1523.800 | 15 | 1537.200   | 15.33 | 1522.510 | 16 | 1522.510   | 16    | 1543.880   | 16 | 1562.670     | 16    | 1522.510 | 16 | 1522.510  | 16    |
| RC106     | 1380.290 | 13 | 1385.550   | 13    | 1377.350 | 13 | 1386.110   | 13    | 1378.690   | 13 | 1388.950     | 13    | 1393.760 | 13 | 1394.480  | 13    |
| RC107     | 1215.080 | 12 | 1217.300   | 12    | 1217.050 | 12 | 1225.730   | 12    | 1213.780   | 12 | 1214.910     | 12    | 1212.830 | 12 | 1214.760  | 12    |
| RC108     | 1142.160 | 11 | 1147.920   | 11.33 | 1145.480 | 12 | 1150.870   | 11.67 | 1121.800   | 11 | 1133.020     | 11    | 1126.440 | 11 | 1132.680  | 11    |
| C101      | 828.937  | 10 | 828.937    | 10    | 828.937  | 10 | 828.937    | 10    | 828.937    | 10 | 828.937      | 10    | 828.937  | 10 | 828.937   | 10    |
| C102      | 830.165  | 10 | 830.600    | 10    | 828.937  | 10 | 828.937    | 10    | 828.937    | 10 | 829.870      | 10    | 828.937  | 10 | 828.937   | 10    |
| C103      | 828.839  | 10 | 829.760    | 10    | 828.065  | 10 | 829.370    | 10    | 831.199    | 10 | 832.000      | 10    | 828.065  | 10 | 828.065   | 10    |
| C104      | 826.723  | 10 | 838.600    | 10    | 825.649  | 10 | 830.150    | 10    | 827.451    | 10 | 833.140      | 10    | 825.649  | 10 | 834.580   | 10    |
| C105      | 828.937  | 10 | 828.937    | 10    | 828.937  | 10 | 828.937    | 10    | 828.937    | 10 | 828.937      | 10    | 828.937  | 10 | 828.937   | 10    |
| C106      | 828.937  | 10 | 828.937    | 10    | 828.937  | 10 | 828.937    | 10    | 828.937    | 10 | 828.937      | 10    | 828.937  | 10 | 828.937   | 10    |
| C107      | 828.937  | 10 | 829.35     | 10    | 828.937  | 10 | 828.937    | 10    | 828.937    | 10 | 828.937      | 10    | 828.937  | 10 | 828.937   | 10    |
| C108      | 828.937  | 10 | 828.937    | 10    | 828.937  | 10 | 828.937    | 10    | 828.937    | 10 | 828.937      | 10    | 828.937  | 10 | 828.937   | 10    |
| C109      | 828.937  | 10 | 829.470    | 10    | 828.937  | 10 | 828.937    | 10    | 828.937    | 10 | 829.470      | 10    | 828.937  | 10 | 828.937   | 10    |

Table 7: Using dual information for the Solomon test set - instances R2, RC2 and C2

| Instances       | MetaOptD       |              | MetaOptD-A     |              | MetaOptR       |              | MetaOptR-A     |              | MetaOptD+R     |              | MetaOptD+R-A    |              | MetaOpt        |              | MetaOpt-A      |              |
|-----------------|----------------|--------------|----------------|--------------|----------------|--------------|----------------|--------------|----------------|--------------|-----------------|--------------|----------------|--------------|----------------|--------------|
|                 | TD             | NV           | TD              | NV           | TD             | NV           | TD             | NV           |
| R201            | 1157.870       | 8            | 1161.730       | 7.67         | 1158.230       | 8            | 1160.530       | 7.67         | 1196.270       | 8            | 1202.590        | 7.33         | 1155.710       | 9            | 1156.930       | 8.67         |
| R202            | 1060.080       | 7            | 1062.700       | 6.67         | 1054.440       | 7            | 1065.680       | 6            | 1076.480       | 7            | 1085.220        | 6            | 1057.610       | 6            | 1065.030       | 6.67         |
| R203            | 897.065        | 6            | 902.430        | 5.67         | 890.662        | 6            | 895.060        | 6            | 924.131        | 6            | 937.880         | 5.33         | 891.709        | 6            | 897.422        | 6            |
| R204            | 759.352        | 5            | 767.050        | 5            | 756.179        | 5            | 760.260        | 5            | 821.800        | 4            | 835.670         | 3.67         | 755.582        | 4            | 760.023        | 4.67         |
| R205            | 964.250        | 6            | 969.840        | 6            | 959.787        | 6            | 963.000        | 6            | 1006.300       | 6            | 1022.240        | 4.67         | 958.450        | 6            | 960.770        | 6            |
| R206            | 919.095        | 5            | 922.560        | 5            | 904.370        | 5            | 908.040        | 5            | 938.338        | 4            | 960.860         | 4            | 899.741        | 5            | 903.284        | 5            |
| R207            | 837.759        | 4            | 852.600        | 4.67         | 821.303        | 4            | 826.700        | 4            | 876.170        | 4            | 909.210         | 3.33         | 810.507        | 4            | 820.510        | 4            |
| R208            | 754.243        | 4            | 756.900        | 3.33         | 728.130        | 4            | 732.230        | 3.67         | 771.307        | 3            | 793.710         | 3            | 738.044        | 4            | 741.660        | 4            |
| R209            | 867.839        | 5            | 874.400        | 5            | 864.807        | 5            | 865.730        | 5            | 872.281        | 5            | 901.270         | 4.67         | 862.990        | 5            | 865.276        | 5            |
| R210            | 943.950        | 5            | 947.510        | 5.33         | 925.976        | 6            | 930.450        | 6            | 985.902        | 4            | 999.680         | 4            | 922.305        | 6            | 926.150        | 6            |
| R211            | 775.414        | 4            | 776.690        | 4.67         | 764.579        | 4            | 771.890        | 4.33         | 809.990        | 4            | 814.420         | 4.67         | 764.650        | 4            | 771.128        | 4.33         |
| RC201           | 1270.090       | 9            | 1275.650       | 8.67         | 1276.430       | 8            | 1277.660       | 8            | 1278.170       | 9            | 1280.710        | 9            | 1272.490       | 8            | 1278.690       | 8.67         |
| RC202           | 1110.550       | 8            | 1113.950       | 8            | 1106.650       | 8            | 1108.740       | 7.67         | 1115.700       | 8            | 1120.660        | 8            | 1102.730       | 8            | 1106.850       | 8            |
| RC203           | 940.876        | 5            | 948.500        | 5            | 940.820        | 5            | 942.640        | 5            | 950.598        | 5            | 957.070         | 5            | 938.428        | 5            | 943.740        | 5.33         |
| RC204           | 819.846        | 4            | 827.920        | 3.67         | 806.834        | 4            | 912.960        | 4.33         | 823.289        | 5            | 833.260         | 4.67         | 797.498        | 4            | 809.880        | 4            |
| RC205           | 1176.980       | 8            | 1180.420       | 8            | 1164.980       | 8            | 1166.000       | 7.67         | 1167.350       | 7            | 1181.120        | 7.67         | 1162.210       | 7            | 1164.430       | 7            |
| RC206           | 1089.990       | 5            | 1092.340       | 5.33         | 1074.580       | 7            | 1077.190       | 6.33         | 1078.930       | 7            | 1085.860        | 6.33         | 1068.670       | 6            | 1073.920       | 5.67         |
| RC207           | 977.283        | 6            | 985.780        | 6            | 969.054        | 6            | 979.930        | 6            | 973.873        | 6            | 979.760         | 6            | 978.605        | 6            | 990.640        | 6.33         |
| RC208           | 792.944        | 5            | 804.590        | 5.00         | 787.855        | 5            | 794.530        | 4.67         | 801.145        | 5            | 810.310         | 5            | 787.972        | 5            | 791.778        | 5            |
| C201            | 642.222        | 3            | 642.222        | 3            | 591.557        | 3            | 591.557        | 3            | 642.222        | 3            | 642.222         | 3            | 591.557        | 3            | 591.557        | 3            |
| C202            | 624.640        | 3            | 650.800        | 3            | 591.557        | 3            | 591.557        | 3            | 638.415        | 3            | 642.040         | 3            | 591.557        | 3            | 591.557        | 3            |
| C203            | 615.579        | 3            | 616.380        | 3            | 604.549        | 3            | 605.400        | 3            | 615.423        | 3            | 616.090         | 3            | 591.173        | 3            | 601.060        | 3            |
| C204            | 613.658        | 3            | 626.250        | 3            | 606.133        | 3            | 608.260        | 3            | 609.467        | 3            | 616.160         | 3            | 602.658        | 3            | 608.100        | 3            |
| C205            | 615.976        | 3            | 629.530        | 3            | 592.573        | 3            | 593.810        | 3            | 626.899        | 4            | 635.390         | 4            | 590.190        | 3            | 591.618        | 3            |
| C206            | 610.038        | 3            | 629.190        | 3            | 591.343        | 3            | 591.740        | 3            | 628.278        | 3            | 632.830         | 3.67         | 590.878        | 3            | 591.882        | 3            |
| C207            | 608.031        | 3            | 622.880        | 3            | 591.263        | 3            | 592.450        | 3            | 602.537        | 3            | 624.410         | 3            | 589.860        | 3            | 590.500        | 3            |
| C208            | 631.443        | 3            | 636.600        | 3            | 589.949        | 3            | 591.040        | 3            | 629.348        | 3            | 638.360         | 3            | 589.307        | 3            | 590.600        | 4            |
| <b>Average*</b> | <b>992.952</b> | <b>8.661</b> | <b>998.813</b> | <b>8.708</b> | <b>984.961</b> | <b>8.696</b> | <b>990.255</b> | <b>8.673</b> | <b>998.901</b> | <b>8.661</b> | <b>1006.925</b> | <b>8.613</b> | <b>983.215</b> | <b>8.643</b> | <b>987.226</b> | <b>8.720</b> |

\*Average values over all instances in Table 6 and Table 7.

## 2. Review on Performance Profiles

Dolan and Moré (2002) propose the performance profiles to evaluate and compare the performances of a set of solvers on a set of test instances. We also use this tool to evaluate the performance of MetaOpt and its extensions in comparison with other algorithms.

Suppose that we have a set of algorithms denoted by  $S$  and a set of instances denoted by  $I$  whose cardinalities are  $n_s$  and  $n_i$ , respectively. Our performance measure is the total distance. For each instance  $i \in I$  and algorithm  $s \in S$ ,  $t_{i,s}$  is defined as the total distance found for instance  $i$  by algorithm  $s$ . The performance on instance  $i$  by algorithm  $s$  is compared to the best performance among all algorithms applied on the same problem. To plot the performance profile figures, we follow these steps: First, the performance ratio, given by

$$r_{i,s} = \frac{t_{i,s}}{\min(t_{i,s} : s \in S)},$$

is computed. Then, to assess the overall performance of an algorithm we compute

$$\rho_s(\tau) = \frac{1}{n_i} |\{i \in I : r_{i,s} \leq \tau\}|,$$

where  $\tau \in \mathbb{R}$  and  $|\cdot|$  denotes the cardinality of a set. The value  $\rho_s(\tau)$  shows the probability for algorithm  $s \in S$  such that a performance ratio  $r_{i,s}$  is within a factor  $\tau$  of the best possible ratio. The function  $\rho_s$  is the (cumulative) distribution function for the performance ratio. Therefore, the value of  $\rho_s(1)$  is the probability that the algorithm  $s$  dominates the rest of the algorithms.

## References

- Dolan, E. D. and J. J. Moré. 2002. “Benchmarking Optimization Software with Performance Profiles.” *Math. Programming* 91:201–213.
- Potvin, J.Y., T. Kervahut, B.L. Garcia and J.M. Rousseau. 1996. “The Vehicle Routing Problem with Time Windows Part I: Tabu Search.” *INFORMS J. Comput.* 8(2):158–164.
